# Supplementary material for: Synthesis of curved Si flakes using Mg powder as both the template and reductant and their derivatives for lithium-ion batteries
Source: Royal Society of Chemistry journal article supplement (doi:10.1039/c5ra10218a), 2015-01-01
Supplement: c5ra10218a1.pdf [file c5ra10218a1.pdf]

# Synthesis of Curved Si Flakes Using Mg Powder as Both Template and Reductant and Their Derivatives for Lithium-Ion Batteries

*Jian Zhu, Da Deng\**

Department of Chemical Engineering and Materials Science, Wayne State University,

\*E-mail: da.deng@wayne.edu

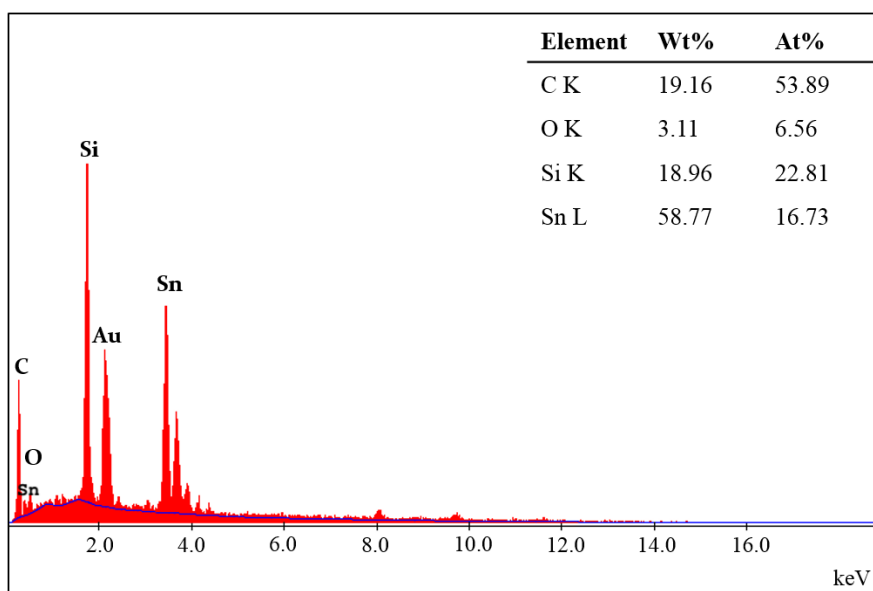

**Figure S1.** EDS analysis of of Si@Sn@CNRs.

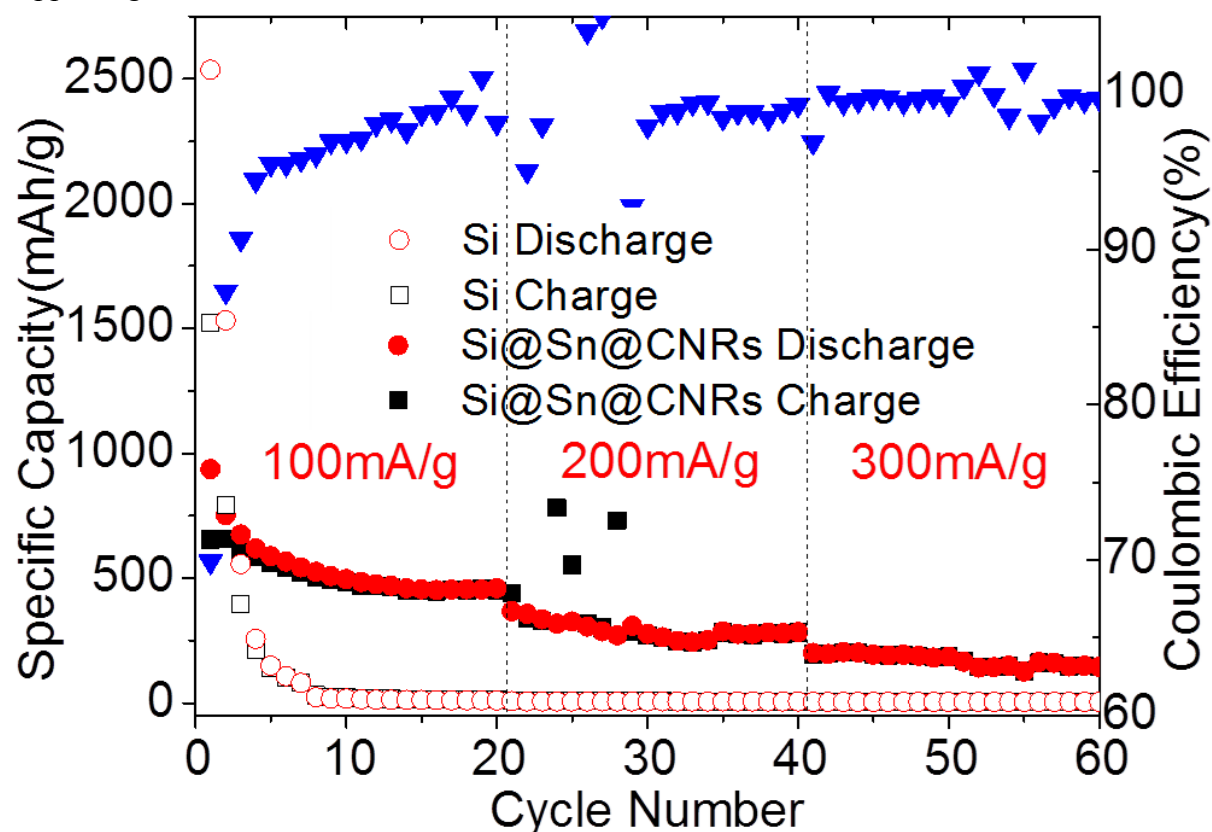

**Figure S2.** Cycling and rate performances of the as synthesized bare Si flakes (hollow) and Si@Sn@CNRs flakes (solid) at testing currents of 100, 200 and 300 mA/g for 20 cycles each.
